# Supplementary material for: Immune Regulatory Cell Bias Following Alemtuzumab Treatment in Relapsing-Remitting Multiple Sclerosis
Source: Front Immunol. 2021 Oct 28;12:706278. doi: 10.3389/fimmu.2021.706278 (PMC8581537; doi:10.3389/fimmu.2021.706278)
Supplement: Supplementary file 1 [file Table_1.xlsx]

## Sheet: Sheet1
Supplemental table 1: Values (mean ± SEM) for data points plotted in figure 1A-F
Time Cohort (months)	Total lymphocytes (cells per liter x 109) (mean ± SEM.)	Total B-cells (cells per liter x 109) (mean ± SEM.)	Total regulatory B-cells (cells per liter x 109) (mean ± SEM.)	Percent lymphocytes within total WBC (mean ± SEM.)	Percent B-cells within lymphocytes (mean ± SEM.)	Percent regulatory B-cells within B-cells (mean ± SEM.)
0	1.78 ± 0.15	0.110 ± 0.014	0.0085 ± 0.0015	28.15 ± 1.56	6.03 ± 0.54	7.13 ± 0.73
6	0.73 ± 0.13	0.103 ± 0.020	0.0130 ± 0.0025	14.97 ± 1.78	14.68 ± 1.66	13.66 ± 1.41
12	0.91 ± 0.06	0.126 ± 0.013	0.0127 ± 0.0018	19.58 ± 1.57	13.91 ± 1.08	9.77 ± 0.78
18	0.73 ± 0.07	0.114 ± 0.027	0.0174 ± 0.0056	17.34 ± 1.86	14.80 ± 2.01	13.01 ± 1.08
24	0.99 ± 0.09	0.154 ± 0.023	0.0159 ± 0.0020	21.38 ± 1.76	15.36 ± 1.67	11.27± 0.79
36	1.10 ± 0.08	0.140 ± 0.011	0.0091 ± 0.0008	19.50 ± 1.72	13.84 ± 1.45	7.04 ± 0.69
